# Supplementary material
Source: PubMed Central journal article supplement (PMC4819438)
Supplement: gilt024599.wt1_default.pdf [file gilt024599.wt1_default.pdf]

**Appendix table** Protocol for Classifying the Condition Leading to Death<sup>a</sup>

| Condition Leading to Death | Source of Data                                                 | Criteria <sup>b</sup>                                                                                                                                                                                                                                                      |
|----------------------------|----------------------------------------------------------------|----------------------------------------------------------------------------------------------------------------------------------------------------------------------------------------------------------------------------------------------------------------------------|
| Cancer                     | Death certificate                                              | <i>ICD-10</i> codes C00.0-C97, D37.0-D37.9, D44.0-D48.7                                                                                                                                                                                                                    |
| Advanced dementia          | Death certificate, comprehensive assessment                    | <i>ICD-10</i> codes F01.0-F01.9, F03, G30.0-G30.9, R54, A81.0; score of 10 or less on Mini-Mental State Examination                                                                                                                                                        |
| Organ failure              | Death certificate                                              | Congestive heart failure ( <i>ICD-10</i> codes I25.5, I42.0-142.9, I50.0-I51.9), chronic lung disease ( <i>ICD-10</i> codes J43.0-J44.9, J47, J61, J84.0-J84.9), chronic kidney disease ( <i>ICD-10</i> codes N18.0-N18.9), or cirrhosis ( <i>ICD-10</i> codes K74.0-74.6) |
| Frailty                    | Comprehensive assessment                                       | Three or more of the following features: weight loss, exhaustion, low physical activity, muscle weakness, slow walking speed                                                                                                                                               |
| Sudden death               | Death certificate, comprehensive assessment, monthly interview | Did not meet criteria for cancer, advanced dementia, organ failure, or frailty; reported no history of cancer, heart disease, chronic lung disease, diabetes, hip fracture, or stroke at any point during study; and was not living in a nursing home at time of death     |
| Other conditions           | Death certificate, comprehensive assessment, monthly interview | Did not meet criteria for cancer, advanced dementia, organ failure, frailty or sudden death                                                                                                                                                                                |

<sup>a</sup>Because the conditions leading to death are not all mutually exclusive, we forced assignment of the decedents to unique groups by sequentially identifying each group and removing those decedents from the pool before identifying the next group, according to the following hierarchy: cancer, advanced dementia, organ failure, and frailty. The hierarchy was based on the premise that cancer is the

dominant illness when it is listed as the immediate or underlying cause of death. For decedents who did not meet criteria for one of these four conditions, the condition leading to death was classified as sudden or other based on the standardized protocol.

<sup>b</sup>The death certificate criteria were based on the immediate or underlying cause of death. Data were used from the comprehensive assessment that was contemporaneous with, or immediately preceded, the start of the functional trajectory. *ICD-10: International Classification of Diseases, Tenth Revision.*
